# Supplementary material
Source: PubMed Central journal article supplement (PMC5446621)
Supplement: JB.00884-16_zjb999094425s1.pdf [file JB.00884-16_zjb999094425s1.pdf]

**Supplemental Figures and Tables for:**

Surashree S. Kulkarni, Yongtao Zhu, Colton J. Brendel and Mark J. McBride.

"Diverse C-terminal sequences involved in *Flavobacterium johnsoniae* protein secretion"

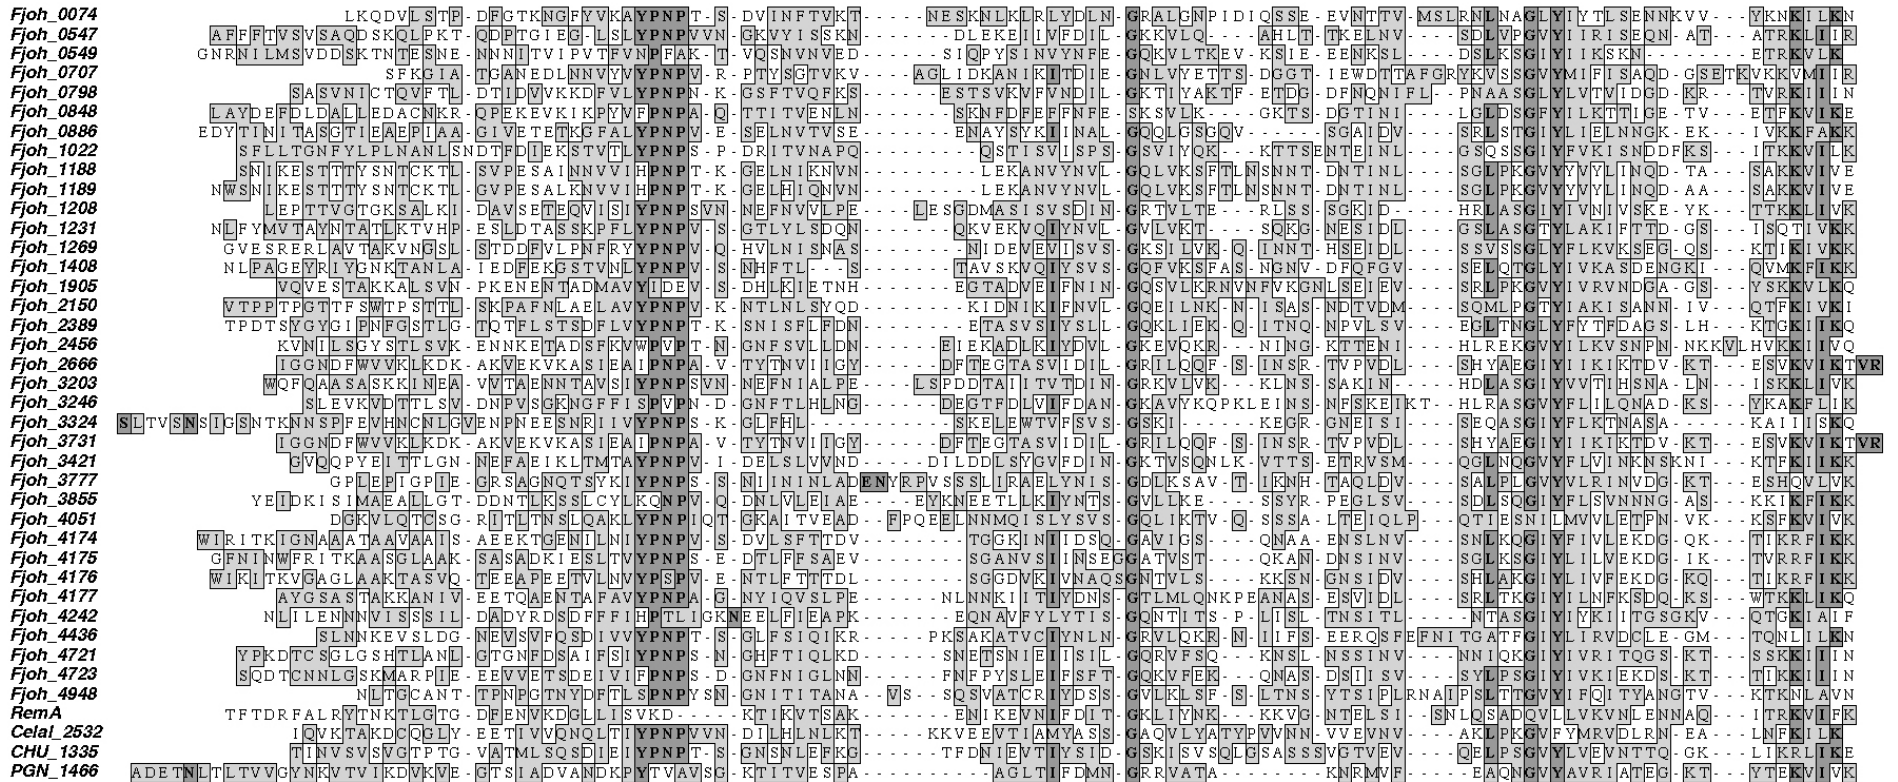

**Fig. S1. Alignment of the C-terminal 100 amino acids of *F. johnsoniae* proteins that belong to TIGRFAM family TIGR04183 (type-A CTD).** Protein sequences were aligned using MUSCLE. Dark shading indicates identical amino acids and light shading indicates similar amino acids. The red arrow indicates the conserved lysine that was mutated to alanine in RemA in the experiment shown in Fig. 6B of the main text. *F. johnsoniae* proteins that were examined experimentally in this study were RemA and Fjoh\_1208 (AmyB). Proteins from other bacteria that were examined experimentally in this study were Celal\_2532 (*C. algicola* AmyA), CHU\_1335 (*C. hutchinsonii* Cel9B), and PGN\_1466 (*P. gingivalis* RgpB).

```

SprB      DGGTIQPGNIFINIPAGDHTTRVHTNG---CTADVDFNIGYA-----PLQLTLTEKGVWNVITASAVGGG
Fjoh_1123 NDTDIVSNTYEADLINAGKYTLTVGKIQNDIYCNKHFELVRSVLPITIKQ-----TRYQELSDNNFIEII---PTTD
Fjoh_1645      ISYRFTVTNTGNVPLSG-----ITITDLLP-GVV-----VSGQALDLNVG-----ESNDTN
Fjoh_1720  GMSYLWSNGATTITQTTDIKAGTYTVDVTSPPENCITSRKTIIVDEHYF-----PEINRIINGTQVEI---QLKKEE
Fjoh_1985      ITIKVSDKSNNISECSFHL-----FAYPVLVDAGED-----INEGQF---YKLVQAV---ALENG
Fjoh_2273      VAGCTSEPAEVPVTIND-----SPVPVLSNDGQNFCLTNPITIGLSSNNINIPATVWYD---APDNGN
Fjoh_3478      TPNFGEHVTFITVNNVGEFSFIN-----TIVSEILPSGYDLVSFN-----TTGGTYDPATQLWTI---PALASG
Fjoh_3952      LTYTFTITNNGNVPPLHN-----ITISDLLP-GVV-----ITGGPISLGVG-----ESDSHT
Fjoh_3971  EVDQTDAAAGSEVIFTITAEENLGNLTATN-----VEVQDILPKGYLLNSSIT---VSSGTYSNSTSVWAI---PSVNAIG
Fjoh_4538      TVAPNGTSNITSEACNDTTLLNLSNLLPEGTP-----ITGTWFDINDT-----RALQGN
Fjoh_4750  FSVTDSFGCKAEVAVYNNVNTPVLGTANFSTIGSYG---KDMYDLYSIYDPIITFIN-----LATGDFTLISWDFGD---GNFSNE
Fjoh_4934      SYLWSNGETSNSAIIISAPGDYSVTVKDANGCEKTKNFKVILSEPATITN-----AAVKDFSGNDNSVLI---EYTG

```

```

SprB      GEYVY-SIDGVNFSSETKFKIYKIGT---YITIVTRDKNGCTDTKDYIIEYVD-----VCLDNYFITPNGDGVNDITWPGCT---N-
Fjoh_1123  GSLEY-SIDGINYQNSNYFSNIQGGT---YVVYLRDKKEGCGQDSKEVTV-----IDYPKHFTPNNDGYNDFWHIKNT---S-
Fjoh_1645  FSALY-KITQTTDINSKGVSNQASVQKKSARGVVVEDNSDYENIDGDKPTVLDLNGCKIKVLNAFSPNGDQKNERFYIQGL---E-
Fjoh_1720  PYFEY-SVDGINFQDSNIFYDVPVGL---HTAYVKEKNGCGGIQLDFVY-----LVFPAFFTPNDSYNDLWEVTGM---E-
Fjoh_1985  FSWSP-SAGLNNTKVGNPI-ATPQETITVIVVFTNKKEGQAEESVITVIPLEK---DETKYGFSPNGDGINDFWEIDKI---T-
Fjoh_2273  LLSASTRLTEQGRYYGFNFPNSACFSSEYIEVTVA-LTDCDNVFPND-----FFIPDGFSPNGDGINDSFVIKDI---EF
Fjoh_3478  QSLVL-TIVAEVLPVSGNYLVAAIEISTPLDVAANNSASASVEPIC-----LTVVNEFTPNNDGANDLFRIDCI---E-
Fjoh_3952  FTGTY-TLQADINAGTVVNAQATVGTTSQSGIKVDEKSDAANENGDAPTIETIDVNGCKIKIFNAISLNGDNMNERFYIRGI---E-
Fjoh_3971  STQTL-TINAKVVDVFNLYLTAHLVQMDQIDTNSNNQDQSAAVSPNC-----LKIYNEFSPNDGQNDTFYIDCI---T-
Fjoh_4538  ILLNAH-GLALGNVQFEYKITTENCPRSS-I LLTMEVNDCKVLACEN-----ILVHNAFSPNGDGKNDVFLIDGI---GDLT-
Fjoh_4750  ENPKH-IYTKVGTYTIKQTVTYPFQCQYSYSATIKVEKGYSS-----LIMPNAFTPNNDGYNDIFAPVFL-----
Fjoh_4934  GNYEF-SLDGLTFQDNPLFTAVATGT---YNAITAKDKNGCGLSNSFLLYV-----LDYPRFFITPNGDGYNDLWVIEDS---N-

```

```

SprB      IYNHLKFSIFDRYGRVI-AKYTYGQK---WDGRYNGEE-----LPSGDYVYVVKLNDENDG---REFVGHFTLYR
Fjoh_1123  KFPNSKTSIFDRYGKLIKELFANDHG---WDGFFYNGSQ-----MPADDYWFKANF---NEN---INFSGHFSLKR
Fjoh_1645  CYPENTVEIYNRWGVLVFDVDHYNNVDRVFKGYSFGRTTMKQSEGLPVGTIFYILKYKDSDSN---PHETSGLYLYNK
Fjoh_1720  NYPQAQVTIFDRYGKLIQAQLNASKMS---WDGTFEKTTP-----MPASDYWYALKI---DDS---KPTLRGHFSLKR
Fjoh_1985  DYPENEVLISRWGDLVYQTKGYDNTNVSFSGIANKSRNLGASQ-LPEGTFFFEIRVNQPHHF---KKLKGYLVLKR
Fjoh_2273  LYPNYTLEIFNRYGNGMYKGDKNKPA---WDGMNYEKSGIAGGV-APNGVYFVLFHFN---KDN---KPKQGRLYLNR
Fjoh_3478  SYPNNEIKVFNRYGALVYSKQHYEND---WDGTANVSGVVNRGDMLPITGTYFYVITII---GDG---TVKKGWLSIMR
Fjoh_3952  CYPDNTVQIFNRWGVLVFERDHYNNNDIVFKGFSEGRITTVKESNGLPEGTYYIVRYKDNNSN---PKQEAGYLYLIK
Fjoh_3971  QYPDNQLEIFNRWGNLVYVYKKGVDNT---WDGKADGSAKT---LPEGTIFYVLDL---GNG---SAKKSGLYLK
Fjoh_4538  CYPENTVEIYNRWGILVFEITHYNNNTINAFDGTSRGRTTIRQSEGLPTGTYFYIVTYKSVLDGNNVIQNNKKEGYLYLSK
Fjoh_4750  GLSDITLDVFDTWGGVIYTEKGTNIRG---WNGKVKDID-----AENGNYYYKIIKTKTFYNH---TIVEKGAFTLIK
Fjoh_4934  VLPNYTIHIFDRYGKFLKEMNQNSPG---WNGLFNGQQ-----LPSDDYWFITLTF---ADG---RNVKGFHSLKR

```

**Fig. S2. Alignment of the C-terminal 200 amino acids of *F. johnsoniae* proteins that belong to TIGRFAM family TIGR04131 (type-B CTD).** Protein sequences were aligned using MUSCLE. Dark shading indicates identical amino acids and light shading indicates similar amino acids. Proteins that were examined experimentally in this study were SprB and Fjoh\_3952.

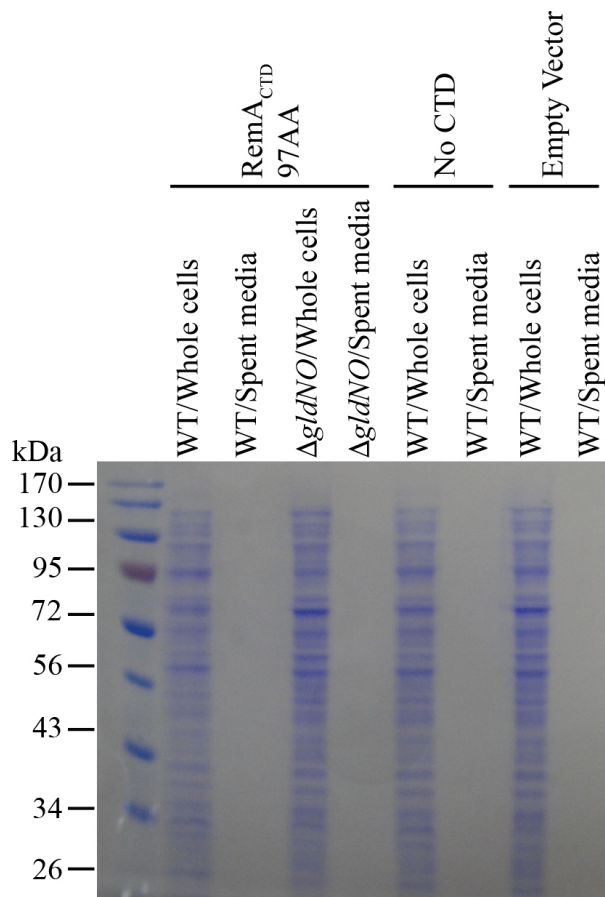

**Fig. S3. Analysis of secreted proteins by SDS-PAGE.** Cultures of wild type cells or of cells of the T9SS mutant  $\Delta$ *gldNO* were incubated in CYE at 25°C with shaking and harvested in stationary phase (22 h). 1 ml samples were centrifuged at 22,000 x g for 15 min. The culture supernatant (spent medium) and intact cells were analyzed by SDS-PAGE followed by Coomassie blue staining. Cells carried either pCP23 ('Empty Vector'), pSK37 which expresses sfGFP with the N-terminal signal peptide from RemA (SP-sfGFP; 'No CTD'), or pSK30, which expresses SP-sfGFP fused to the 97-amino acid CTD of RemA (SP-sfGFP-CTD<sub>RemA</sub>; 'RemA<sup>CTD</sup> 97 AA'). Cell samples corresponded to 10  $\mu$ g protein per lane and samples from spent media corresponded to the volume of spent medium that contained 10  $\mu$ g cell protein before the cells were removed.

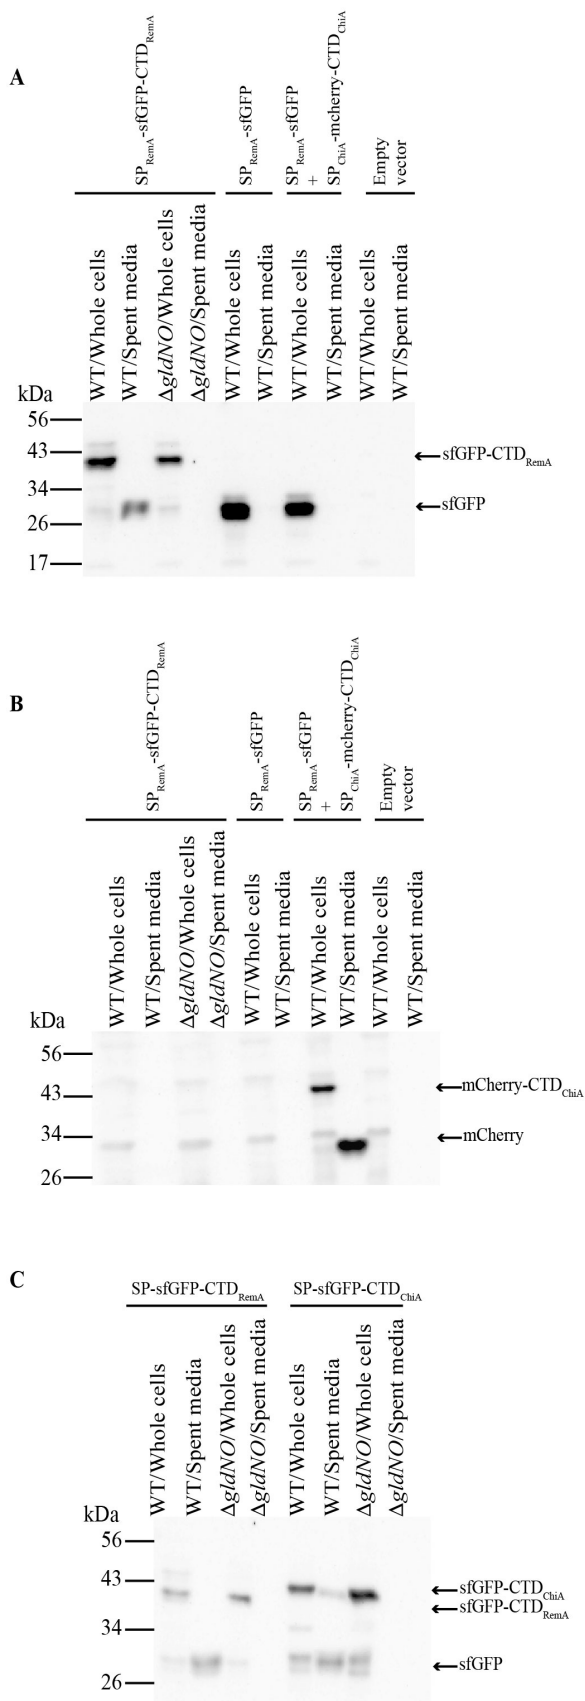

**Fig. S4. Analysis of secreted proteins to determine if overexpression of CTD causes cell lysis or periplasmic leakage.** Cultures of wild type cells or of the T9SS mutant  $\Delta gldNO$  expressing SP<sub>RemA</sub>-sfGFP-CTD<sub>RemA</sub> (pSK30), SP<sub>RemA</sub>-sfGFP (pSK37), or SP<sub>RemA</sub>-sfGFP (pSK96) and SP<sub>ChiA</sub>-mCherry-CTD<sub>ChiA</sub> (pSSK52) were incubated in CYE at 25°C with shaking. 'Empty vector' refers to pCP23. 1 ml samples were centrifuged at 22,000 x g for 15 min. The culture supernatant (spent medium) and intact cells were analyzed by SDS-PAGE, followed by western blot analysis using (A) anti-GFP antibodies and (B) anti-mCherry antibodies. Identical samples were used in panels A and B. (C) To estimate protein expression from the *remA* and *chiA* promoters, cultures of wild type cells or of the T9SS mutant  $\Delta gldNO$  expressing SP<sub>RemA</sub>-sfGFP-CTD<sub>RemA</sub> (pSK30; Pr<sub>remA</sub>), or SP<sub>ChiA</sub>-sfGFP-CTD<sub>ChiA</sub> (pCB3; Pr<sub>chiA</sub>) were incubated in CYE at 25°C with shaking. The culture supernatant (spent medium) and intact cells were analyzed by SDS-PAGE, followed by western blot analysis with anti-GFP antibodies. For all panels cell samples corresponded to 10  $\mu$ g protein per lane and samples from spent media corresponded to the volume of spent medium that contained 10  $\mu$ g cell protein before the cells were removed.

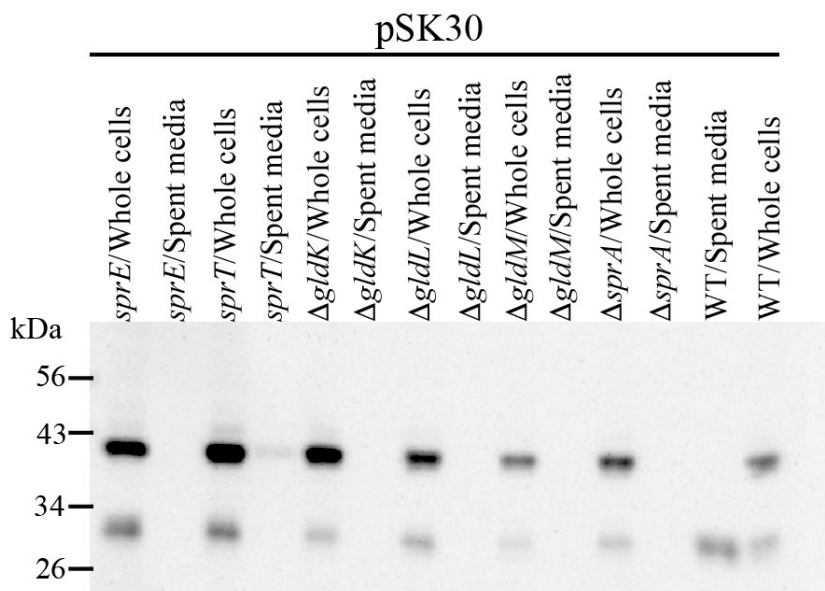

**Fig. S5. Components of T9SS required for secretion of SP-sfGFP-CTD<sub>RemA</sub>.** Cultures of wild type cells (WT) or of the T9SS mutants were incubated in CYE at 25°C with shaking and harvested in stationary phase (22 h). 1 ml samples were centrifuged at 22,000 x g for 15 min. The culture supernatant (spent medium) and intact cells were analyzed for sfGFP by western blot. Cells carried pSK30, which expresses SP-sfGFP fused to the 97-amino acid CTD of RemA (SP-sfGFP-CTD<sub>RemA</sub>). Whole cell samples corresponded to 10  $\mu$ g protein per lane and samples from spent media corresponded to the volume of spent medium that contained 10  $\mu$ g cell protein before the cells were removed. Samples were separated by SDS-PAGE, and sfGFP was detected using anti-serum against GFP.

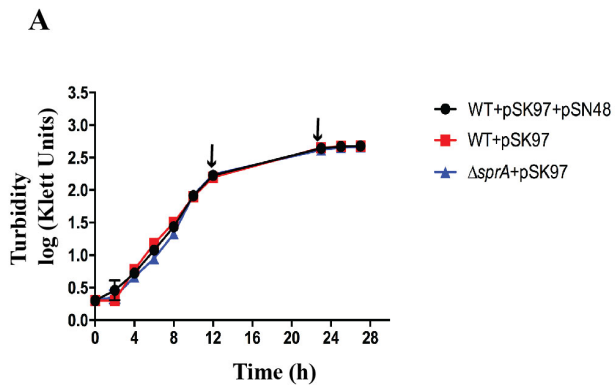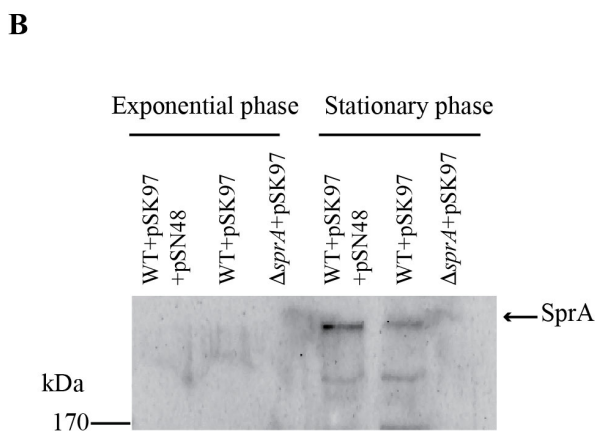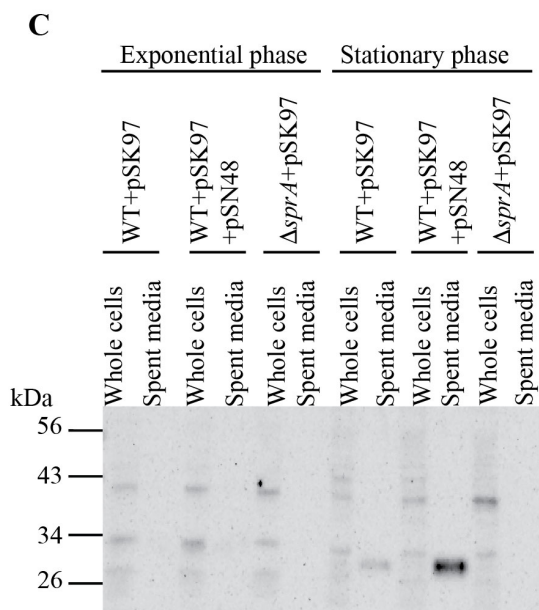

**Fig. S6. Overexpression of SprA results in increased sfGFP secretion in stationary phase.** Cultures of wild type cells or of cells of the T9SS mutant  $\Delta sprA$  were incubated in CYE at 25°C with shaking and harvested in late exponential phase and stationary phase as indicated in Panel A. Cells carried pSK97 which expresses SP-sfGFP-CTD<sub>RemA</sub> (97 AA CTD). Where indicated cells also carried pSN48 which expresses SprA. Cells were analyzed by western blot using anti-SprA antibodies (B) or anti-GFP antibodies (C). For Panel B, equal amounts (10  $\mu$ g whole cell protein) were loaded per lane. For panel C, whole cell samples corresponded to 10  $\mu$ g protein per lane and samples from spent media corresponded to the volume of spent medium that contained 10  $\mu$ g cell protein before the cells were removed. Samples were separated by SDS-PAGE, and antibodies were used to detect the respective proteins.

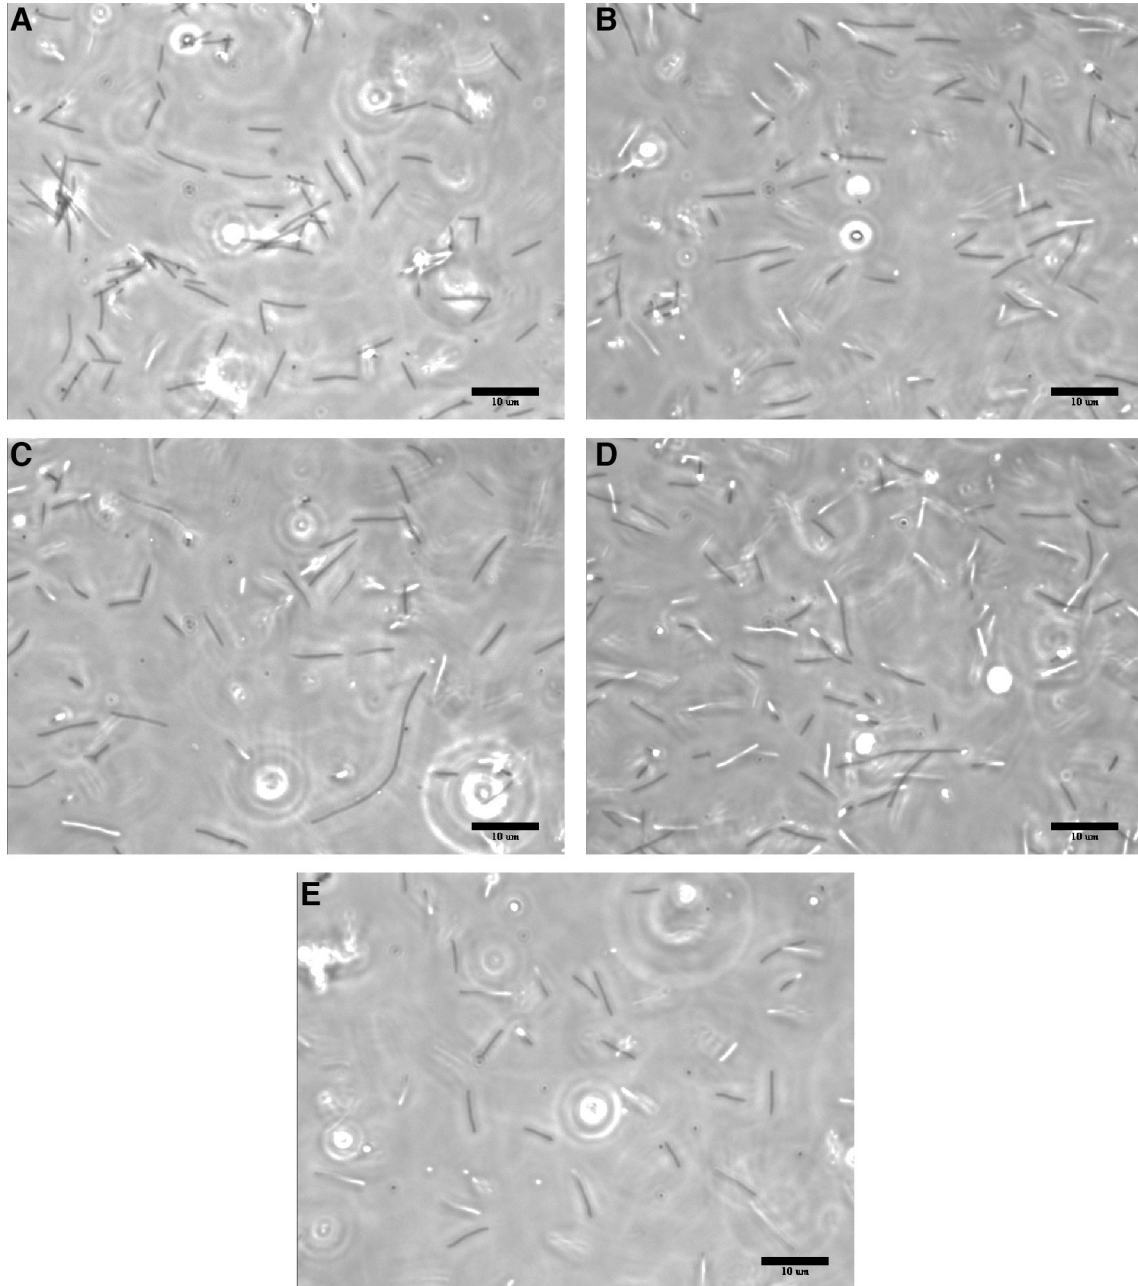

**Fig. S7. Detection of cell-surface localized sfGFP.** Protein G-coated 0.5- $\mu\text{m}$  polystyrene spheres coated with anti-GFP antibodies were added to cells of *F. johnsoniae* and images were recorded using a Photometrics CoolSNAP<sub>cf</sub><sup>2</sup> camera mounted on an Olympus BH-2 phase-contrast microscope. Cells of wild-type *F. johnsoniae* expressing full length RemA with sfGFP fused after the signal peptide (A) attached to spheres, whereas cells expressing SP-sfGFP-CTD<sub>RemA97AA</sub> (B), SP-sfGFP-CTD<sub>RemA87AA</sub> (C), SP-sfGFP-CTD<sub>RemA62AA</sub> (D), and SP-sfGFP with no CTD (E) did not. Bars indicate 10  $\mu\text{m}$ .



**A**

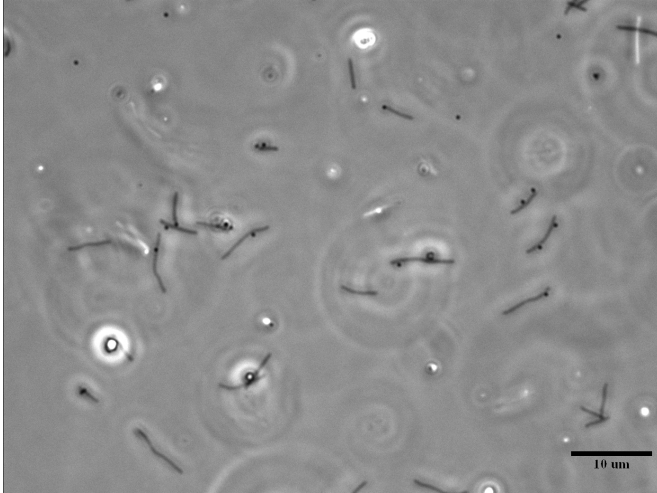

**B**

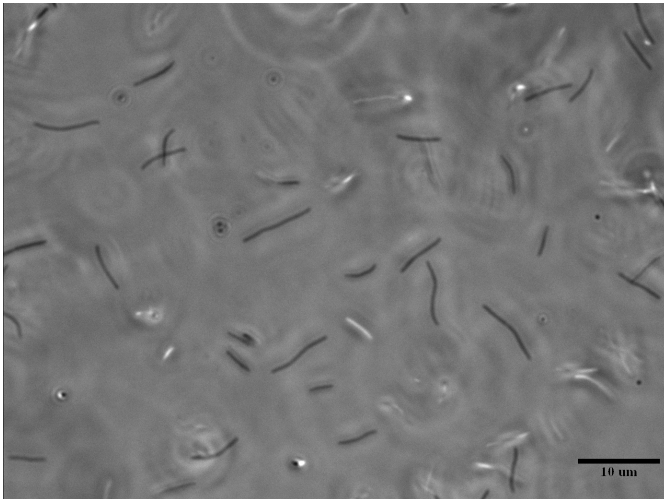

**Fig. S8. Detection of cell-surface localized SprB.** Protein G-coated 0.5- $\mu\text{m}$  polystyrene spheres carrying anti-SprB antibodies were added to cells of *F. johnsoniae* and images were recorded using a Photometrics Cool-SNAP<sub>cf</sub><sup>2</sup> camera mounted on an Olympus BH-2 phase-contrast microscope. Cells of wild-type *F. johnsoniae* FJ1 attached to the spheres (A), whereas cells of the *sprB* transposon insertion mutant FJ117 which produces SprB lacking the C-terminal 34 amino acids (B) did not. Bars indicate 10  $\mu\text{m}$ .

**Table S1. Strains and plasmids used in this study.**

| <b>Strain</b>                       | <b>Description<sup>a</sup></b>                                                                                                                                                    | <b>Source or reference</b>                |
|-------------------------------------|-----------------------------------------------------------------------------------------------------------------------------------------------------------------------------------|-------------------------------------------|
| <b><i>E. coli</i> strains</b>       |                                                                                                                                                                                   |                                           |
| DH5 $\alpha$ mcr                    | Strain used for general cloning                                                                                                                                                   | Life Technologies (Grand Island, NY, USA) |
| HB101                               | Strain used with pRK2013 for triparental conjugation                                                                                                                              | (1, 2)                                    |
| <b><i>F. johnsoniae</i> strains</b> |                                                                                                                                                                                   |                                           |
| FJ1                                 | wild type <i>F. johnsoniae</i> ATCC 17061 <sup>T</sup>                                                                                                                            | (3)                                       |
| CJ1827                              | <i>rpsL2</i> ; Sm <sup>r</sup> 'wild-type' <i>F. johnsoniae</i> strain used in construction of deletion mutants                                                                   | (4)                                       |
| CJ2122                              | $\Delta$ <i>gldK</i>                                                                                                                                                              | (5)                                       |
| CJ2157                              | $\Delta$ <i>gldL</i>                                                                                                                                                              | (5)                                       |
| CJ2262                              | $\Delta$ <i>gldM</i>                                                                                                                                                              | (5)                                       |
| CJ1631A                             | $\Delta$ ( <i>gldN-gldO</i> )                                                                                                                                                     | (6)                                       |
| CJ2302                              | $\Delta$ <i>sprA</i>                                                                                                                                                              | (5)                                       |
| FJ149                               | <i>sprE</i>                                                                                                                                                                       | (7)                                       |
| CJ2518                              | $\Delta$ <i>sprF</i>                                                                                                                                                              | (8)                                       |
| KDF002                              | <i>sprT</i>                                                                                                                                                                       | (9)                                       |
| CJ2116                              | $\Delta$ <i>porU</i>                                                                                                                                                              | (10)                                      |
| CJ2130                              | $\Delta$ <i>porV</i>                                                                                                                                                              | (10)                                      |
| CJ1922                              | $\Delta$ <i>sprB</i>                                                                                                                                                              | (4)                                       |
| CJ1984                              | $\Delta$ <i>remA</i>                                                                                                                                                              | (11)                                      |
| FJ117                               | <i>sprB</i> HimarEm2 mutant                                                                                                                                                       | (12)                                      |
| FJ156                               | <i>sprB</i> HimarEm2 mutant                                                                                                                                                       | (12)                                      |
| <b>Plasmid</b>                      | <b>Description</b>                                                                                                                                                                | <b>Source or reference</b>                |
| pCB3                                | 735-bp sfGFP without stop codon amplified and cloned into pSSK52. Encodes SP <sub>ChiA</sub> -sfGFP-CTD <sub>ChiA(105AA)</sub> ; Ap <sup>r</sup> (Tc <sup>r</sup> )               | This study                                |
| pCB4                                | 440-bp region encoding 62 amino acids of CTD <sub>ChiA</sub> inserted into pCB3. Encodes SP <sub>ChiA</sub> -sfGFP-CTD <sub>ChiA(62AA)</sub> ; Ap <sup>r</sup> (Tc <sup>r</sup> ) | This study                                |
| pCP11                               | <i>E. coli-F. johnsoniae</i> shuttle plasmid; Ap <sup>r</sup> (Em <sup>r</sup> )                                                                                                  | (13)                                      |
| pCP23                               | <i>E. coli-F. johnsoniae</i> shuttle plasmid; Ap <sup>r</sup> (Tc <sup>r</sup> )                                                                                                  | (14)                                      |
| pMM105.A                            | <i>E. coli-Capnocytophaga canimorsus</i> shuttle plasmid; Ap <sup>r</sup> (Em <sup>r</sup> )                                                                                      | (15)                                      |
| pRK2013                             | Helper plasmid for triparental conjugation; IncP Tra <sup>+</sup> Km <sup>r</sup>                                                                                                 | (2)                                       |
| pRR48                               | 1294-bp fragment spanning <i>sprF</i> inserted into pCP23;                                                                                                                        | (16)                                      |

|       |                                                                                                                                                                                                                                               |            |
|-------|-----------------------------------------------------------------------------------------------------------------------------------------------------------------------------------------------------------------------------------------------|------------|
| pSK30 | Ap <sup>r</sup> (Tc <sup>r</sup> )<br>339-bp region encoding 97 amino acids of CTD <sub>RemA</sub><br>inserted into pYT179. Encodes SP <sub>RemA</sub> -sfGFP-<br>CTD <sub>RemA(97AA)</sub> ; Ap <sup>r</sup> (Tc <sup>r</sup> )              | This study |
| pSK37 | SP <sub>RemA</sub> -sfGFP with stop codon cloned into pYT40.<br>Encodes SP-sfGFP; Ap <sup>r</sup> (Tc <sup>r</sup> )                                                                                                                          | This study |
| pSK56 | 657-bp region encoding 218 amino acids of CTD <sub>SprB</sub><br>inserted into pYT179. Encodes SP-sfGFP- CTD <sub>SprB(218AA)</sub> ;<br>Ap <sup>r</sup> (Tc <sup>r</sup> )                                                                   | This study |
| pSK58 | 687-bp region encoding 228 amino acids of CTD <sub>Fjoh_3952</sub><br>inserted into pYT179. Encodes SP-sfGFP-<br>CTD <sub>Fjoh_3952(228AA)</sub> ; Ap <sup>r</sup> (Tc <sup>r</sup> )                                                         | This study |
| pSK62 | 3549-bp region encoding 1182 amino acids of CTD <sub>SprB</sub><br>inserted into pYT179. Encodes SP-sfGFP-<br>CTD <sub>SprB(1182AA)</sub> ; Ap <sup>r</sup> (Tc <sup>r</sup> )                                                                | This study |
| pSK65 | 417-bp region encoding 108 amino acids of CTD <sub>Celal_2532</sub><br>inserted into pYT179. Encodes SP-sfGFP- CTD <sub>Celal_2532</sub> ;<br>Ap <sup>r</sup> (Tc <sup>r</sup> )                                                              | This study |
| pSK71 | 312-bp region encoding 87 amino acids of CTD <sub>RemA</sub><br>inserted into pYT179. Encodes SP-sfGFP- CTD <sub>RemA(87AA)</sub> ;<br>Ap <sup>r</sup> (Tc <sup>r</sup> )                                                                     | This study |
| pSK75 | 339-bp region encoding 103 amino acids of CTD <sub>PGN_1466</sub><br>inserted into pYT179. Encodes SP-sfGFP- CTD <sub>PGN_1466</sub> ;<br>Ap <sup>r</sup> (Tc <sup>r</sup> )                                                                  | This study |
| pSK76 | 294-bp region encoding 97 amino acids of CTD <sub>CHU_1335</sub><br>inserted into pYT179 Encodes SP-sfGFP- CTD <sub>CHU_1335</sub> ;<br>Ap <sup>r</sup> (Tc <sup>r</sup> )                                                                    | This study |
| pSK79 | 258-bp region encoding 85 amino acids near the C-<br>terminus of RemA but lacking the C-terminal 12 amino<br>acids inserted into pYT179. Encodes SP-sfGFP-<br>CTD <sub>RemA(lacking final 12 AA)</sub> ; Ap <sup>r</sup> (Tc <sup>r</sup> )   | This study |
| pSK81 | 234-bp region encoding 62 amino acids of CTD <sub>RemA</sub><br>inserted into pYT179. Encodes SP-sfGFP- CTD <sub>RemA(62AA)</sub> ;<br>Ap <sup>r</sup> (Tc <sup>r</sup> )                                                                     | This study |
| pSK82 | 390-bp region encoding 99 amino acids of CTD <sub>AmyB</sub><br>inserted into pYT179. Encodes SP-sfGFP- CTD <sub>AmyB(99AA)</sub> ;<br>Ap <sup>r</sup> (Tc <sup>r</sup> )                                                                     | This study |
| pSK84 | 396-bp fragment spanning the Fjoh_1634 promoter, start<br>codon, and the N-terminal signal peptide-encoding region<br>inserted into pSK30. Encodes SP <sub>Fjoh_1634</sub> -sfGFP-CTD <sub>RemA</sub> ;<br>Ap <sup>r</sup> (Tc <sup>r</sup> ) | This study |
| pSK85 | 312-bp region encoding 73 amino acids of CTD <sub>AmyB</sub><br>inserted into pYT179. Encodes SP-sfGFP- CTD <sub>AmyB(73AA)</sub> ;<br>Ap <sup>r</sup> (Tc <sup>r</sup> )                                                                     | This study |
| pSK86 | 270-bp region encoding 59 amino acids of CTD <sub>AmyB</sub><br>inserted into pYT179. Encodes SP-sfGFP- CTD <sub>AmyB(59AA)</sub> ;                                                                                                           | This study |

|        |                                                                                                                                                                                                                                |            |
|--------|--------------------------------------------------------------------------------------------------------------------------------------------------------------------------------------------------------------------------------|------------|
| pSK89  | Ap <sup>r</sup> (Tc <sup>r</sup> )<br>491-bp region encoding 79 amino acids of CTD <sub>ChiA</sub><br>inserted into pCB3. Encodes SP <sub>ChiA</sub> -sfGFP-<br>CTD <sub>ChiA(79AA)</sub> ; Ap <sup>r</sup> (Tc <sup>r</sup> ) | This study |
| pSK91  | 300-bp region encoding CTD <sub>RemA</sub> with K1432A mutation<br>inserted into pYT179. Encodes SP-sfGFP-<br>CTD <sub>RemA(K1432A)</sub> ; Ap <sup>r</sup> (Tc <sup>r</sup> )                                                 | This study |
| pSK93  | 300-bp region encoding 99 amino acids of CTD <sub>SprB</sub><br>inserted into pYT179. Encodes SP-sfGFP- CTD <sub>SprB(99AA)</sub> ;<br>Ap <sup>r</sup> (Tc <sup>r</sup> )                                                      | This study |
| pSK96  | SP <sub>RemA</sub> -sfGFP from pSK37 cloned into pCP11. Encodes<br>SP <sub>RemA</sub> -sfGFP; Ap <sup>r</sup> (Em <sup>r</sup> )                                                                                               | This study |
| pSK97  | SP <sub>RemA</sub> -sfGFP-CTD <sub>RemA</sub> from pSK30 inserted into<br>pMM105.A. Encodes SP <sub>RemA</sub> -sfGFP-CTD <sub>RemA(97AA)</sub> ; Ap <sup>r</sup><br>(Em <sup>r</sup> )                                        | This study |
| pSN48  | pCP23 carrying <i>sprA</i> ; Ap <sup>r</sup> (Tc <sup>r</sup> )                                                                                                                                                                | (17)       |
| pSSK30 | pCP23 carrying mcherry; Ap <sup>r</sup> (Tc <sup>r</sup> )                                                                                                                                                                     | (18)       |
| pSSK51 | 484-bp fragment spanning the <i>chiA</i> promoter, start codon,<br>and N-terminal signal peptide-encoding region inserted<br>into pSSK30. Encodes SP <sub>ChiA</sub> -mCherry; Ap <sup>r</sup> (Tc <sup>r</sup> )              | (18)       |
| pSSK52 | 566-bp region encoding 105 amino acids of CTD <sub>ChiA</sub><br>inserted into pSSK51. Encodes SP <sub>ChiA</sub> -mCherry-CTD <sub>ChiA</sub> ;<br>Ap <sup>r</sup> (Tc <sup>r</sup> )                                         | (18)       |
| pTB263 | Plasmid expressing fluorescent protein sfGFP; Ap <sup>r</sup>                                                                                                                                                                  | (19)       |
| pYT40  | 511-bp fragment spanning the <i>remA</i> promoter, start<br>codon, and the N-terminal signal peptide-encoding<br>region inserted into pCP23; Ap <sup>r</sup> (Tc <sup>r</sup> )                                                | This study |
| pYT179 | 735-bp sfGFP amplified without stop codon and cloned<br>into pYT40. Encodes SP <sub>RemA</sub> -sfGFP; Ap <sup>r</sup> (Tc <sup>r</sup> )                                                                                      | This study |
| pYT180 | 4383-bp fragment encoding 1386 amino acids of the C-<br>terminus of RemA inserted in pYT179. Encodes SP <sub>RemA</sub> -<br>sfGFP-CTD <sub>RemA(1386AA)</sub> ; Ap <sup>r</sup> (Tc <sup>r</sup> )                            | This study |

<sup>a</sup>Antibiotic resistance phenotypes are as follows: ampicillin, Ap<sup>r</sup>; erythromycin, Em<sup>r</sup>; streptomycin, Sm<sup>r</sup>; tetracycline, Tc<sup>r</sup>. The antibiotic resistance phenotypes given in parentheses are those expressed in *F. johnsoniae* but not in *E. coli*. The antibiotic resistance phenotypes without parentheses are those expressed in *E. coli* but not in *F. johnsoniae*.

**Table S2. Primers used in this study**

---

|      |                                                                                                                                   |
|------|-----------------------------------------------------------------------------------------------------------------------------------|
| 1269 | 5' <u>GCTAGGGTACCACGTTCTGATAGGCACAAAAATGC</u> 3'; forward primer used in construction of pYT40; KpnI site underlined              |
| 1270 | 5' GCTAGGGATCCGCCATTAGTTGGCATTCCAGGAAAA 3'; reverse primer used in construction of pYT40; BamHI site underlined                   |
| 1389 | 5' <u>GCTAGGGATCCTCTAAAGGTGAAGAACTGTTACCCG</u> 3'; forward primer used in construction of pSK37 and pYT179; BamHI site underlined |
| 1390 | 5' <u>GCTAGGCATGCTTATTTGTAGAGCTCATCCATGCCG</u> 3'; reverse primer used in construction of pSK37; SphI site underlined             |
| 1399 | 5' <u>GCTAGTCTAGAACAGATACGAAAGATTATTACATCGAG</u> 3'; forward primer used in construction of pSK93; XbaI site underlined           |
| 1400 | 5' <u>GCTAGGCATGCTTATCTGTATAAAGTGAAATGTCCAAC</u> 3'; reverse primer used in construction of pSK56; SphI site underlined           |
| 1404 | 5' <u>GCTAGGCATGCTCACCTAATAACAATAACTAACCTC</u> 3'; reverse primer used in construction of pSSK52; SphI site underlined            |
| 1427 | 5' <u>GCTAGTCTAGAGCAACGATAGCTTATTTTAAAAACAAT</u> 3'; forward primer used in construction of pSK89; XbaI site is underlined        |
| 1488 | 5' <u>GCTAGTCTAGAGATCGTTTTGCACTTCGTTACACT</u> 3'; forward primer used in construction of pSK30; XbaI site underlined              |
| 1489 | 5' <u>GCTAGGCATGCCTTACTTGGCAAATGGATTTTTTA</u> 3'; reverse primer used in construction of pSK30; SphI site underlined              |
| 1599 | 5' <u>GCTAGTCTAGAGCAACGATAGCTTATTTTAAAAACAAT</u> 3'; forward primer used in construction of pSK89; XbaI site underlined           |
| 1600 | 5' <u>GCTAGTCTAGAGCTTATGCAGCTTATTTTCGCATCACAA</u> 3'; forward primer used in construction of pSSK52; XbaI site underlined         |
| 1771 | 5' <u>GCTAGGGATCCCTAACCCGACTATCATAGAACCGAC</u> 3'; forward primer used in construction of pYT314; BamHI site underlined           |
| 1772 | 5' <u>GCTAGGTCGACTGTTGTTACAGCCATGAGTACTAAGG</u> 3'; reverse primer used in construction of pYT314; SalI site underlined           |
| 1773 | 5' <u>GCTAGGTCGACTCGATTAGTAACTGTCCTTGTACGC</u> 3'; forward primer used in construction of pYT316; SalI site underlined            |
| 1774 | 5' <u>GCTAGGCATGCTAAAAGTTCAGTTGGCAGTTCTTCG</u> 3'; reverse primer used in construction of pYT316; SphI site underlined            |
| 1880 | 5' <u>GCTAGGCATGCTGGCGAGGAATTACCTTCTGGTGA</u> 3'; forward primer used in construction of pSK62; XbaI site underlined              |
| 1843 | 5' <u>GCTAGTCTAGAGTGGTGATTACAATTGATCCAAGC</u> 3'; forward primer used in construction of pSK56; XbaI site underlined              |
| 1868 | 5' <u>GCTAGTCTAGAGTCGAAGTGCCATCGATTACAGTA</u> 3'; forward primer used in construction of pSK58; XbaI site underlined              |
| 1885 | 5' <u>GCTAGTCTAGAGCTTTAGAGGCTTTTGAAAATGTG</u> 3'; forward primer used in construction of pSK65; XbaI site underlined              |
| 1886 | 5' <u>GCTAGGCATGCTTGTGGGCGTTTCTGAACTATCTC</u> 3'; reverse primer used in construction of pSK65; SphI site underlined              |

1870 5' GCTAGGCATGCGCTAAGCCATTTTATTGATTTGGA 3'; reverse primer used in construction of pSK58; SphI site underlined

1899 5' GCTAGTCTAGAACATTAGGAACTGGTGATTTTGAG 3'; forward primer used in construction of pSK71; XbaI site underlined

1923 5' GCTAGTCTAGAGAGAGATATCGCTGATGAAACGAAC 3'; forward primer used in construction of pSK75; XbaI site underlined

1924 5' GCTAG GCATGC GCCCTTATTAGAGAATTGCAGTGT 3'; reverse primer used in construction of pSK75; SphI site underlined

1925 5' GCTAGTCTAGAGTATCGGTAAGTGTGGGAACTCCT 3'; forward primer used in construction of pSK76; XbaI site underlined

1926 5' GCTAGGCATGCCTGTATAGGCTATTCTTTTATAAGGCG 3'; reverse primer used in construction of pSK76; SphI site underlined

1930 5' GCTAGTCTAGAACTTCTGCAAAAGAAAATATTAAGAA 3'; forward primer used in construction of pSK81; XbaI site underlined

1932 5' GCTAGGCATGCCTATTCAAGATTAAC TTTTACAAGCAGCAC 3'; reverse primer used in construction of pSK79; SphI site underlined

1933 5' GCTAGTCTAGAGAACCAACA ACTGTTGGAACAGGA 3'; forward primer used in construction of pSK82; XbaI site underlined

1934 5' GCTAGGCATGCCGAATCGAACAATAGCGAACAAGC 3'; reverse primer used in construction of pSK82; SphI site underlined

1940 5' GCTAGTCTAGAGAAGACATTGCTCAGGTTGATGTA 3'; forward primer used in construction of pCB4; XbaI site underlined

1946 5' GCTAGGGTACCGCTTTGAGCATGAATATTGTATCC 3'; forward primer used in construction of pSK84; KpnI site underlined

1947 5' GCTAGGGATCCATCTTGAGCAAATGAAGTTAGGGA 3'; reverse primer used in construction of pSK84; BamHI site underlined

1948 5' GCTAGTCTAGATATCCAAACCCATCTGTAAACAATGAA 3'; forward primer used in construction of pSK85; XbaI site underlined

1949 5' GCTAGTCTAGACCAGAATTGGAAAGCGGAGAC 3'; forward primer used in construction of pSK86; XbaI site underlined

1962 5' GCTAGGCATGCCTATTTAAAGATCACTGCTCTGGTTATCTG 3'; reverse primer used in construction of pSK91; SphI site underlined

**Table S3. Prevalence of T9SS genes and CTD-encoding genes in 104 members of the phylum *Bacteroidetes*<sup>a</sup>.**

| Genome                                           | T9SS components   |                   |                   |                   |                   | CTDs                    |                         |
|--------------------------------------------------|-------------------|-------------------|-------------------|-------------------|-------------------|-------------------------|-------------------------|
|                                                  | GldK<br>TIGR03525 | GldL<br>TIGR03513 | GldM<br>TIGR03517 | GldN<br>TIGR03523 | SprA<br>TIGR04189 | Type A CTD<br>TIGR04183 | Type B CTD<br>TIGR04131 |
| <b>Class Flavobacteriia</b>                      |                   |                   |                   |                   |                   |                         |                         |
| <i>Aequorivita sublithicola</i> DSM 14238        | 1                 | 1                 | 1                 | 1                 | 1                 | 112                     | 5                       |
| <i>Algibacter</i> sp. HZ22                       | 1                 | 1                 | 1                 | 1                 | 1                 | 55                      | 10                      |
| <i>Capnocytophaga canimorsus</i> Cc5             | 1                 | 1                 | 1                 | 1                 | 1                 | 1                       | 10                      |
| <i>Capnocytophaga haemolytica</i> CCUG 32990     | 1                 | 1                 | 1                 | 1                 | 1                 | 2                       | 6                       |
| <i>Capnocytophaga ochracea</i> DSM 7271          | 1                 | 1                 | 1                 | 1                 | 1                 | 2                       | 8                       |
| <i>Capnocytophaga</i> sp. F0383                  | 1                 | 1                 | 1                 | 1                 | 1                 | 2                       | 7                       |
| <i>Cellulophaga algicola</i> DSM 14237           | 1                 | 1                 | 1                 | 1                 | 1                 | 13                      | 16                      |
| <i>Cellulophaga lytica</i> DSM 7489              | 1                 | 1                 | 1                 | 1                 | 1                 | 14                      | 13                      |
| <i>Chryseobacterium</i> sp. IHB B 17019          | 1                 | 1                 | 1                 | 1                 | 1                 | 83                      | 18                      |
| <i>Chryseobacterium</i> sp. StrB126              | 1                 | 1                 | 1                 | 1                 | 1                 | 101                     | 10                      |
| <i>Croceibacter atlanticus</i> HTCC2559          | 1                 | 1                 | 1                 | 1                 | 1                 | 45                      | 8                       |
| <i>Dokdonia</i> sp. PRO95                        | 1                 | 1                 | 1                 | 1                 | 1                 | 17                      | 10                      |
| <i>Donghaeana dokdonensis</i> DSW-6              | 1                 | 1                 | 1                 | 1                 | 1                 | 85                      | 17                      |
| <i>Elizabethkingia meningoseptica</i> FMS-007    | 0                 | 0                 | 0                 | 0                 | 0                 | 0                       | 0                       |
| <i>Elizabethkingia</i> sp. BM10                  | 0                 | 0                 | 0                 | 0                 | 0                 | 0                       | 0                       |
| <i>Flavobacteriaceae</i> bacterium 3519-10       | 1                 | 1                 | 1                 | 1                 | 1                 | 55                      | 6                       |
| <i>Flavobacterium branchiophilum</i> FL-15       | 1                 | 1                 | 1                 | 1                 | 1                 | 37                      | 10                      |
| <i>Flavobacterium columnare</i> ATCC 49512       | 1                 | 1                 | 1                 | 1                 | 1                 | 35                      | 7                       |
| <i>Flavobacterium indicum</i> GPTSA100-9         | 1                 | 1                 | 1                 | 1                 | 1                 | 43                      | 16                      |
| <i>Flavobacterium johnsoniae</i> ATCC 17061      | 1                 | 1                 | 1                 | 2                 | 1                 | 40                      | 12                      |
| <i>Flavobacterium psychrophilum</i> JIP02/86     | 1                 | 1                 | 1                 | 1                 | 1                 | 38                      | 10                      |
| <i>Fluviicola taffensis</i> DSM 16823            | 1                 | 1                 | 2                 | 2                 | 1                 | 180                     | 50                      |
| <i>Gramella forsetii</i> KT0803                  | 1                 | 1                 | 1                 | 1                 | 1                 | 11                      | 7                       |
| <i>Krokinobacter diaphorus</i> 4H-3-7-5          | 1                 | 1                 | 1                 | 1                 | 1                 | 15                      | 10                      |
| <i>Lacinutrix</i> sp. 5H-3-7-4                   | 1                 | 1                 | 1                 | 1                 | 1                 | 31                      | 16                      |
| <i>Lutibacter profundus</i> LP1                  | 1                 | 1                 | 1                 | 1                 | 1                 | 19                      | 3                       |
| <i>Maribacter</i> sp. HTCC2170                   | 1                 | 1                 | 1                 | 1                 | 1                 | 10                      | 13                      |
| <i>Muricauda lutaonensis</i> CC-HSB-11           | 1                 | 1                 | 1                 | 1                 | 1                 | 7                       | 13                      |
| <i>Muricauda ruestringensis</i> DSM 13258        | 1                 | 1                 | 1                 | 1                 | 1                 | 7                       | 13                      |
| <i>Myroides profundus</i> D25                    | 1                 | 1                 | 1                 | 1                 | 1                 | 7                       | 12                      |
| <i>Myroides</i> sp. A21                          | 1                 | 1                 | 1                 | 1                 | 1                 | 4                       | 7                       |
| <i>Ornithobacterium rhinotracheale</i> DSM 15997 | 1                 | 1                 | 1                 | 1                 | 1                 | 6                       | 2                       |
| <i>Owenweeksia hongkongensis</i> DSM 17368       | 1                 | 1                 | 1                 | 1                 | 1                 | 159                     | 26                      |
| <i>Polaribacter</i> sp. MED152                   | 1                 | 1                 | 1                 | 1                 | 1                 | 27                      | 8                       |
| <i>Riemerella anatipestifer</i> DSM 15868        | 1                 | 1                 | 1                 | 1                 | 1                 | 15                      | 1                       |
| <i>Robiginitalea biformata</i> HTCC2501          | 1                 | 1                 | 1                 | 1                 | 1                 | 7                       | 12                      |
| <i>Siansivirga zeaxanthinifaciens</i> CC-SAMT-1  | 1                 | 1                 | 1                 | 1                 | 1                 | 51                      | 10                      |
| <i>Weeksella virosa</i> DSM 16922                | 1                 | 1                 | 1                 | 1                 | 1                 | 36                      | 3                       |
| <i>Winogradskyella</i> sp. PG-2                  | 1                 | 1                 | 1                 | 1                 | 1                 | 66                      | 17                      |
| <i>Zobellia galactanivorans</i> DsiJT            | 1                 | 1                 | 1                 | 1                 | 1                 | 29                      | 17                      |
| <i>Zunongwangia profunda</i> SM-A87              | 1                 | 1                 | 1                 | 1                 | 1                 | 7                       | 5                       |
| <b>Class Cytophagia</b>                          |                   |                   |                   |                   |                   |                         |                         |
| <i>Belliella baltica</i> DSM 15883               | 1                 | 1                 | 1                 | 1                 | 1                 | 11                      | 4                       |
| <i>Cyclobacterium amurskyense</i> KCTC 12363     | 1                 | 1                 | 1                 | 1                 | 1                 | 20                      | 5                       |
| <i>Cyclobacterium marinum</i> DSM 745            | 1                 | 1                 | 1                 | 1                 | 1                 | 18                      | 7                       |
| <i>Cytophaga hutchinsonii</i> ATCC 33406         | 1                 | 1                 | 2                 | 2                 | 1                 | 118                     | 27                      |
| <i>Dyadobacter fermentans</i> DSM 18053          | 1                 | 1                 | 1                 | 1                 | 1                 | 88                      | 11                      |
| <i>Echinicola vietnamensis</i> DSM 17526         | 1                 | 1                 | 1                 | 1                 | 1                 | 17                      | 9                       |
| <i>Emticicia oligotrophica</i> DSM 17448         | 1                 | 1                 | 1                 | 1                 | 1                 | 31                      | 10                      |
| <i>Flexibacter litoralis</i> DSM 6794            | 1                 | 1                 | 1                 | 3                 | 1                 | 52                      | 11                      |
| <i>Hymenobacter</i> sp. APR13                    | 1                 | 1                 | 1                 | 1                 | 1                 | 83                      | 9                       |
| <i>Hymenobacter</i> sp. DG25A                    | 1                 | 1                 | 1                 | 1                 | 1                 | 54                      | 6                       |
| <i>Hymenobacter</i> sp. PAMC26554                | 1                 | 1                 | 1                 | 1                 | 1                 | 51                      | 8                       |
| <i>Hymenobacter swuensis</i> DY53                | 1                 | 1                 | 1                 | 1                 | 1                 | 100                     | 8                       |
| <i>Leadbetterella byssophila</i> DSM 17132       | 1                 | 1                 | 1                 | 1                 | 1                 | 17                      | 4                       |
| <i>Marivirga tractuosa</i> DSM 4126              | 1                 | 1                 | 1                 | 1                 | 1                 | 39                      | 11                      |
| <i>Persicobacter</i> sp. JZB09                   | 1                 | 1                 | 1                 | 1                 | 1                 | 32                      | 3                       |
| <i>Pontibacter akesuensis</i> AKS 1T             | 1                 | 1                 | 1                 | 1                 | 1                 | 47                      | 11                      |
| <i>Pontibacter korlensis</i> X14-1T              | 1                 | 1                 | 1                 | 1                 | 1                 | 47                      | 11                      |
| <i>Rufibacter</i> sp. DG15C                      | 1                 | 1                 | 1                 | 1                 | 1                 | 49                      | 13                      |
| <i>Rufibacter tibetensis</i> 1351                | 1                 | 1                 | 1                 | 1                 | 1                 | 56                      | 11                      |

|                                                |           |           |           |           |            |            |    |
|------------------------------------------------|-----------|-----------|-----------|-----------|------------|------------|----|
| <i>Runella slithyiformis</i> DSM 19594         | 1         | 1         | 1         | 1         | 1          | 33         | 18 |
| <i>Spirosoma linguale</i> DSM 74               | 1         | 1         | 1         | 1         | 1          | 53         | 14 |
| <i>Spirosoma radiotolerans</i> DG5A            | 1         | 1         | 1         | 1         | 1          | 50         | 15 |
| Class Sphingobacteriia                         |           |           |           |           |            |            |    |
| <i>Algoriphagus</i> sp. M8-2                   | 1         | 1         | 1         | 1         | 1          | 16         | 6  |
| <i>Arachidicoccus</i> sp. BS20                 | 2         | 1         | 1         | 2         | 1          | 11         | 0  |
| <i>Chitinophaga pinensis</i> DSM 2588          | 1         | 1         | 1         | 1         | 1          | 51         | 36 |
| <i>Halicomonobacter hydrossis</i> DSM 1100     | 1         | 1         | 1         | 1         | 1          | 144        | 36 |
| <i>Mucilaginibacter</i> PAMC26640              | 1         | 1         | 1         | 2         | 1          | 7          | 9  |
| <i>Niabella soli</i> DSM 19437                 | 0         | 0         | 0         | 0         | 0          | 0          | 0  |
| <i>Niastella koreensis</i> DSM 17620           | 1         | 1         | 1         | 1         | 1          | 111        | 31 |
| <i>Pedobacter cryoconitis</i> PAMC 27485       | 1         | 1         | 1         | 1         | 1          | 3          | 5  |
| <i>Pedobacter heparinus</i> DSM 2366           | 1         | 1         | 1         | 1         | 1          | 8          | 13 |
| <i>Pedobacter saltans</i> DSM 12145            | 1         | 1         | 1         | 1         | 1          | 29         | 10 |
| <i>Pedobacter</i> sp. PACM 27299               | 1         | 1         | 1         | 1         | 1          | 1          | 9  |
| <i>Saprosira grandis</i> Lewin                 | 1         | 1         | 1         | 3         | 2          | 67         | 16 |
| <i>Solitalea canadensis</i> DSM 3403           | 1         | 1         | 1         | 1         | 1          | 6          | 18 |
| <i>Sphingobacterium</i> sp. 21                 | 2         | 1         | 1         | 2         | 1          | 1          | 2  |
| <i>Sphingobacterium</i> sp. ML3W               | 1         | 1         | 1         | 1         | 0          | 1          | 0  |
| Class Bacteroidia                              |           |           |           |           |            |            |    |
| <i>Alistipes finegoldii</i> DSM 17242          | 0         | 0         | 0         | 0         | 0          | 0          | 0  |
| <i>Bacteroides cellulolyticus</i> WH2          | 1         | 1         | 1         | 1         | 1          | 19         | 1  |
| <i>Bacteroides dorei</i> CL03T12C01            | 0         | 0         | 0         | 0         | 0          | 0          | 0  |
| <i>Bacteroides fragilis</i> NCTC 9343          | 0         | 1         | 1         | 0         | 0          | 0          | 0  |
| <i>Bacteroides helcogenes</i> DSM 20613        | 0         | 0         | 0         | 0         | 0          | 0          | 0  |
| <i>Bacteroides ovatus</i> ATCC 8483            | 0         | 0         | 0         | 0         | 0          | 0          | 0  |
| <i>Bacteroides thetaiotaomicron</i> VPI-5482   | 0         | 0         | 0         | 0         | 0          | 0          | 0  |
| <i>Bacteroides vulgatus</i> ATCC 8482          | 0         | 0         | 0         | 0         | 0          | 0          | 0  |
| <i>Bacteroides xylanisolvens</i> XB1A          | 0         | 0         | 0         | 0         | 0          | 0          | 0  |
| <i>Barnesiella viscericola</i> DSM 18177       | 1         | 1         | 1         | 1         | 1          | 41         | 1  |
| <i>Draconibacterium orientale</i> FH5          | 2         | 1         | 1         | 1         | 1          | 23         | 7  |
| <i>Odoribacter splanchnicus</i> DSM 20712      | 0         | 0         | 0         | 0         | 2          | 2          | 1  |
| <i>Paludibacter propionicigenes</i> DSM 17365  | 1         | 1         | 1         | 1         | 1          | 10         | 6  |
| <i>Parabacteroides distasonis</i> ATCC 8503    | 1         | 1         | 1         | 1         | 1          | 7          | 1  |
| <i>Porphyromonas asaccharolytica</i> DSM 20707 | 1         | 1         | 1         | 1         | 1          | 29         | 1  |
| <i>Porphyromonas gingivalis</i> ATCC 33277     | 1         | 1         | 1         | 1         | 1          | 17         | 1  |
| <i>Prevotella dentalis</i> EDSM 3688           | 1         | 1         | 1         | 1         | 1          | 9          | 1  |
| <i>Prevotella denticola</i> F0289              | 1         | 1         | 1         | 1         | 1          | 8          | 1  |
| <i>Prevotella enoeca</i> F0113                 | 1         | 1         | 1         | 1         | 1          | 4          | 1  |
| <i>Prevotella fusca</i> W1435                  | 1         | 1         | 1         | 1         | 1          | 6          | 1  |
| <i>Prevotella intermedia</i> 17-2              | 1         | 1         | 1         | 1         | 1          | 19         | 1  |
| <i>Prevotella melaninogenica</i> ATCC 25845    | 1         | 1         | 1         | 1         | 1          | 14         | 1  |
| <i>Prevotella ruminicola</i> 23                | 1         | 1         | 1         | 1         | 1          | 1          | 1  |
| <i>Prevotella</i> sp. F0039                    | 1         | 1         | 1         | 1         | 1          | 13         | 1  |
| <i>Rikenellaceae</i> bacterium M3              | 0         | 0         | 0         | 0         | 0          | 0          | 0  |
| <i>Tannerella forsythia</i> ATCC 43037         | 1         | 1         | 1         | 1         | 1          | 28         | 0  |
| T9SS components                                |           |           |           |           |            |            |    |
| GldK                                           | GldL      | GldM      | GldN      | SprA      | CTDs       |            |    |
| TIGR03525                                      | TIGR03513 | TIGR03517 | TIGR03523 | TIGR04189 | Type A CTD | Type B CTD |    |
|                                                |           |           |           |           | TIGR04183  | TIGR04131  |    |

<sup>a</sup>Only members of the *Bacteroidetes* with completed genome sequences were examined and only one member of each species was used. Occurrence of genes encoding T9SS components or of genes encoding proteins with T9SS-associated CTDs are shown. Red indicates the presence of a gene and the number indicates the number of such genes in the genome. Genes were identified using the Integrated Microbial Genomes (IMG version 4.0.1) Function Profile Tool and using the TIGRFAM terms listed. The trusted cutoffs set by The Institute for Genomic Research were used in each case as indicated in the Methods section of the main text. These may underrepresent the actual number of proteins secreted by T9SSs. For example, more than 30 proteins are thought to be secreted by the *P. gingivalis* T9SS (20), but only 18 were identified above.



**Table S4. Prevalence of T9SS genes and CTD-encoding genes in organisms outside of the phylum *Bacteroidetes*<sup>a</sup>.**

| Genome                                                             | T9SS components |           |           |           |           | CTDs       |            |   |
|--------------------------------------------------------------------|-----------------|-----------|-----------|-----------|-----------|------------|------------|---|
|                                                                    | GldK            | GldL      | GldM      | GldN      | SprA      | Type A CTD | Type B CTD |   |
|                                                                    | TIGR03525       | TIGR03513 | TIGR03517 | TIGR03523 | TIGR04189 | TIGR04183  | TIGR04131  |   |
| <b>Bacteria (non <i>Bacteroidetes</i> , 3777 genomes examined)</b> |                 |           |           |           |           |            |            |   |
| <i>Chloroherpeton thalassium</i> ATCC 35110 (Chlorobi)             |                 | 0         | 0         | 0         | 0         | 1          | 30         | 0 |
| <i>Arthrospira platensis</i> YZ (Cyanobacteria)                    |                 | 0         | 0         | 0         | 0         | 0          | 1          | 0 |
| <i>Leptolyngbya</i> sp. PCC 7376 (Cyanobacteria)                   |                 | 0         | 0         | 0         | 0         | 0          | 1          | 0 |
| <i>Synechococcus</i> sp. JA-2-3B'a(2-13) (Cyanobacteria)           |                 | 0         | 0         | 0         | 0         | 0          | 1          | 0 |
| <i>Trichodesmium erythraeum</i> IMS101 (Cyanobacteria)             |                 | 0         | 0         | 0         | 0         | 0          | 1          | 0 |
| <i>Fibrobacter succinogenes</i> S85 (Fibrobacteres)                |                 | 0         | 0         | 0         | 0         | 1          | 33         | 0 |
| <i>Thermincola potens</i> JR (Firmicutes)                          |                 | 0         | 0         | 0         | 0         | 0          | 1          | 0 |
| <i>Gemmatimonas aurantiaca</i> T-27T (Gemmatimonadetes)            |                 | 0         | 0         | 0         | 0         | 1          | 0          | 0 |
| <i>Melioribacter roseus</i> P3M (Ignavibacteriae)                  |                 | 0         | 0         | 0         | 0         | 1          | 85         | 0 |
| <i>Ignavibacterium album</i> JCM 16511 (Ignavibacteriae)           |                 | 0         | 0         | 0         | 0         | 1          | 147        | 0 |
| <i>Rhodothermus marinus</i> DSM 4252 (Rhodothermaeota)             |                 | 0         | 0         | 0         | 0         | 2          | 48         | 0 |
| <i>Salinibacter ruber</i> DSM 13855 (Rhodothermaeota)              |                 | 0         | 0         | 0         | 0         | 1          | 18         | 0 |
| <b>Archaea (218 genomes examined)</b>                              |                 |           |           |           |           |            |            |   |
| No species identified with T9SS genes or CTDs                      |                 | 0         | 0         | 0         | 0         | 0          | 0          | 0 |
| <b>Eukarya (36 genomes examined)</b>                               |                 |           |           |           |           |            |            |   |
| No species identified with T9SS genes or CTDs                      |                 | 0         | 0         | 0         | 0         | 0          | 0          | 0 |

<sup>a</sup>3777 completed genomes were examined. Only completed genome sequences were examined and only one member of each species was used. Since the vast majority of species had no genes encoding T9SS proteins or T9SS-associated CTDs, only species with genes encoding T9SS components or genes encoding proteins with T9SS-associated CTDs are shown. Red indicates the presence of a gene and the number indicates the number of such genes in the genome. Genes were identified using the Integrated Microbial Genomes (IMG version 4.0.1) Function Profile Tool and using the TIGRFAM terms listed. The trusted cutoffs set by The Institute for Genomic Research were used in each case as indicated in the Methods section of the main text. The phyla to which the species belong are indicated in parentheses. Note that the CTDs from *A. platensis*, *Leptolyngbya* sp., and *T. erythraeum* were not found at the C-terminus and thus may be false positives.

**Table S5. Amino acid sequence identities of *F. johnsoniae* T9SS components with orthologs from other members of the phylum *Bacteroidetes*<sup>a</sup>.**

| <i>F. johnsoniae</i> | <i>C. algicola</i> | <i>C. hutchinsonii</i> | <i>P. gingivalis</i> |
|----------------------|--------------------|------------------------|----------------------|
| GldK                 | 67% over 467 AA    | 33% over 477 AA        | 34% over 502 AA      |
| GldL                 | 58% over 219 AA    | 27% over 273 AA        | 19% over 313 AA      |
| GldM                 | 41% over 526 AA    | 20% over 546 AA        | 24% over 539 AA      |
| GldN                 | 52% over 334 AA    | 14% over 353 AA        | 16% over 409 AA      |
| SprA                 | 52% over 2460 AA   | 32% over 2537 AA       | 32% over 2622 AA     |
| SprE                 | 40% over 887 AA    | 21% over 902 AA        | 15% over 1191 AA     |
| SprT                 | 48% over 240 AA    | 25% over 244 AA        | 22% over 254 AA      |
| PorU                 | No ortholog        | 33% over 1332 AA       | 23% over 1335 AA     |
| PorV                 | 57% over 404 AA    | 34% over 417 AA        | 42% over 413 AA      |

<sup>a</sup>*F. johnsoniae* T9SS components were aligned with orthologs from *Cellulophaga algicola* (Class *Flavobacteriia*), *Cytophaga hutchinsonii* (Class *Cytophagia*) and *Porphyromonas gingivalis* (Class *Bacteroidia*) using MUSCLE. In each case percent amino acid (AA) identity over the region of similarity is listed. Note that *C. algicola*, which has a functional T9SS, lacks a PorU ortholog.

## References

1. **Bolivar F, Backman K.** 1979. Plasmids of *Escherichia coli* as cloning vectors. *Methods Enzymol.* **68**:245-267.
2. **Figurski DH, Helinski DR.** 1979. Replication of an origin-containing derivative of plasmid RK2 dependent on a plasmid function provided in trans. *Proc. Natl. Acad. Sci. USA* **76**:1648-1652.
3. **Braun TF, Khubbar MK, Saffarini DA, McBride MJ.** 2005. *Flavobacterium johnsoniae* gliding motility genes identified by *mariner* mutagenesis. *J. Bacteriol.* **187**:6943-6952.
4. **Rhodes RG, Pucker HG, McBride MJ.** 2011. Development and use of a gene deletion strategy for *Flavobacterium johnsoniae* to identify the redundant motility genes *remF*, *remG*, *remH*, and *remI*. *J. Bacteriol.* **193**:2418-2428.
5. **Shrivastava A, Johnston JJ, van Baaren JM, McBride MJ.** 2013. *Flavobacterium johnsoniae* GldK, GldL, GldM, and SprA are required for secretion of the cell-surface gliding motility adhesins SprB and RemA. *J. Bacteriol.* **195**:3201-3212.
6. **Rhodes RG, Samarasam MN, Shrivastava A, van Baaren JM, Pochiraju S, Bollampalli S, McBride MJ.** 2010. *Flavobacterium johnsoniae* *gldN* and *gldO* are partially redundant genes required for gliding motility and surface localization of SprB. *J. Bacteriol.* **192**:1201-1211.
7. **Rhodes RG, Samarasam MN, Van Groll EJ, McBride MJ.** 2011. Mutations in *Flavobacterium johnsoniae* *sprE* result in defects in gliding motility and protein secretion. *J. Bacteriol.* **193**:5322-5327.
8. **Zhu Y, Thomas F, Larocque R, Li N, Duffieux D, Cladiere L, Souchaud F, Michel G, McBride MJ.** submitted. Novel genetic tools unravel the crucial role of a laterally acquired alginate lyase for brown algal biomass degradation by *Zobellia galactanivorans*
9. **Sato K, Naito M, Yukitake H, Hirakawa H, Shoji M, McBride MJ, Rhodes RG, Nakayama K.** 2010. A protein secretion system linked to bacteroidete gliding motility and pathogenesis. *Proc. Natl. Acad. Sci. USA* **107**:276-281.
10. **Kharade SS, McBride MJ.** 2015. *Flavobacterium johnsoniae* PorV is required for secretion of a subset of proteins targeted to the type IX secretion system. *J. Bacteriol.* **197**:147-158.
11. **Shrivastava A, Rhodes RG, Pochiraju S, Nakane D, McBride MJ.** 2012. *Flavobacterium johnsoniae* RemA is a mobile cell-surface lectin involved in gliding. *J. Bacteriol.* **194**:3678-3688.
12. **Nelson SS, Bollampalli S, McBride MJ.** 2008. SprB is a cell surface component of the *Flavobacterium johnsoniae* gliding motility machinery. *J. Bacteriol.* **190**:2851-2857.
13. **McBride MJ, Kempf MJ.** 1996. Development of techniques for the genetic manipulation of the gliding bacterium *Cytophaga johnsonae*. *J. Bacteriol.* **178**:583-590.
14. **Agarwal S, Hunnicutt DW, McBride MJ.** 1997. Cloning and characterization of the *Flavobacterium johnsoniae* (*Cytophaga johnsonae*) gliding motility gene, *gldA*. *Proc. Natl. Acad. Sci. USA* **94**:12139-12144.
15. **Mally M, Cornelis GR.** 2008. Genetic tools for studying *Capnocytophaga canimorsus*. *Appl Environ Microbiol* **74**:6369-6377.
16. **Rhodes RG, Nelson SS, Pochiraju S, McBride MJ.** 2011. *Flavobacterium johnsoniae* *sprB* is part of an operon spanning the additional gliding motility genes *sprC*, *sprD*, and *sprF*. *J. Bacteriol.* **193**:599-610.

17. **Nelson SS, Glocka PP, Agarwal S, Grimm DP, McBride MJ.** 2007. *Flavobacterium johnsoniae* SprA is a cell-surface protein involved in gliding motility. *J. Bacteriol.* **189**:7145-7150.
18. **Kharade SS, McBride MJ.** 2014. The *Flavobacterium johnsoniae* chitinase ChiA is required for chitin utilization and is secreted by the type IX secretion system. *J. Bacteriol.* **196**:961-970.
19. **Uehara T, Dinh T, Bernhardt TG.** 2009. LytM-domain factors are required for daughter cell separation and rapid ampicillin-induced lysis in *Escherichia coli*. *J. Bacteriol.* **191**:5094-5107.
20. **Veith PD, Nor Muhammad NA, Dashper SG, Likic VA, Gorasia DG, Chen D, Byrne SJ, Catmull DV, Reynolds EC.** 2013. Protein substrates of a novel secretion system are numerous in the *Bacteroidetes* phylum and have in common a cleavable C-terminal secretion signal, extensive post-translational modification and cell surface attachment. *J. Proteome Res.* **12**:4449-4461.
